# Supplementary material for: Using cavitation rheology to understand dipeptide-based low molecular weight gels
Source: Royal Society of Chemistry journal article supplement (doi:10.1039/c9sm01023h), 2019-01-01
Supplement: c9sm01023h1.zip [file c9sm01023h1.zip]

[illegible]

The diagram shows a circuit with a Nano+5V supply at the top and Gnd at the bottom. A vertical chain of four resistors connects them: R1 (0.1% 20k) and R2 (0.1% 10k) are in series on the left, and R3 (0.1% 20k) and R4 (0.1% 20k) are in series on the right. The top node is connected to Nano+5V. The bottom node is connected to Gnd. The node between R1 and R2 is connected to PCB\_ID1. The node between R3 and R4 is connected to PCB\_ID2.

[illegible]

The circuit diagram shows the MCP4151 DAC (IC4) and the LM324 op-amp (IC3b). The MCP4151 is powered by +5V and Gnd. Its CS pin is connected to SPI\_CS\_SIGNAL\_OFS, SCK to SPI\_Clk, and SDI to SPI\_DATA. The VDD pin is connected to +5V and VSS to Gnd. The DAC output is connected to the non-inverting input (+) of the LM324 op-amp through a 22k resistor (R11). The op-amp is configured as a voltage follower, with its output connected to the inverting input (-) through a 22k resistor (R13) and to the DAC output through a 47k resistor (R12). The op-amp is powered by +12V and -12V. The output of the op-amp is connected to the SIGNAL\_OUT pin through a 22k resistor (R14).

[illegible]

Diagram of the Sensor CN2 connector:

- +10V0
- SENSOR\_OUT+
- Gnd
- SENSOR\_OUT-

Legend:

- 
- 
- 

Sensor CN2
