# Supplementary figures and images for: Using cavitation rheology to understand dipeptide-based low molecular weight gels
Source: Royal Society of Chemistry journal article supplement (doi:10.1039/c9sm01023h), 2019-01-01

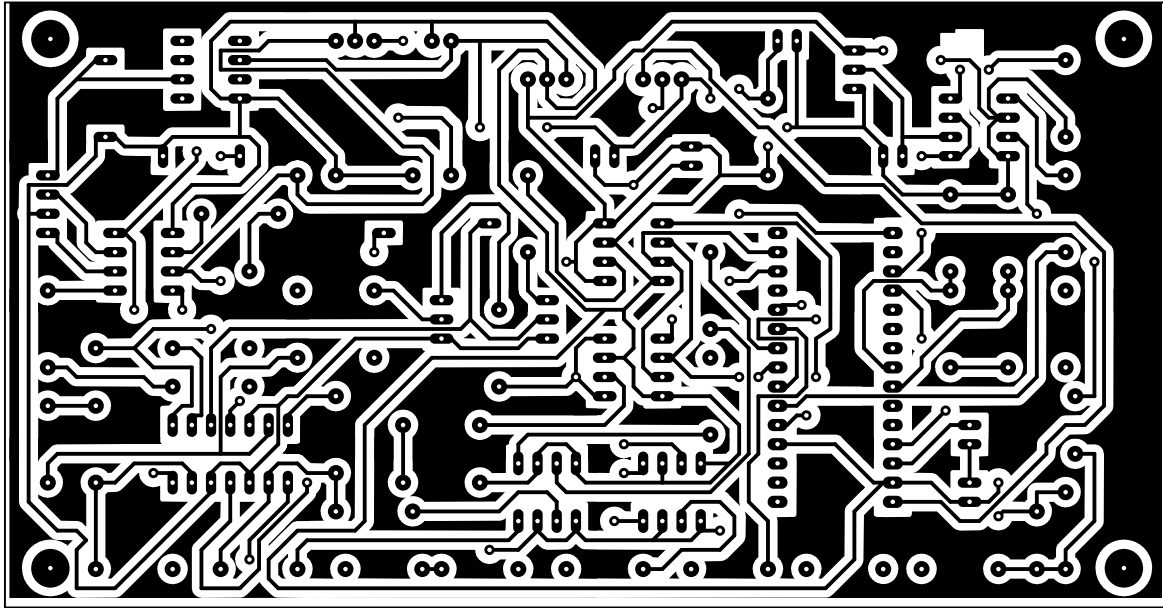

Supplement: c9sm01023h1.zip [file c9sm01023h1.zip]

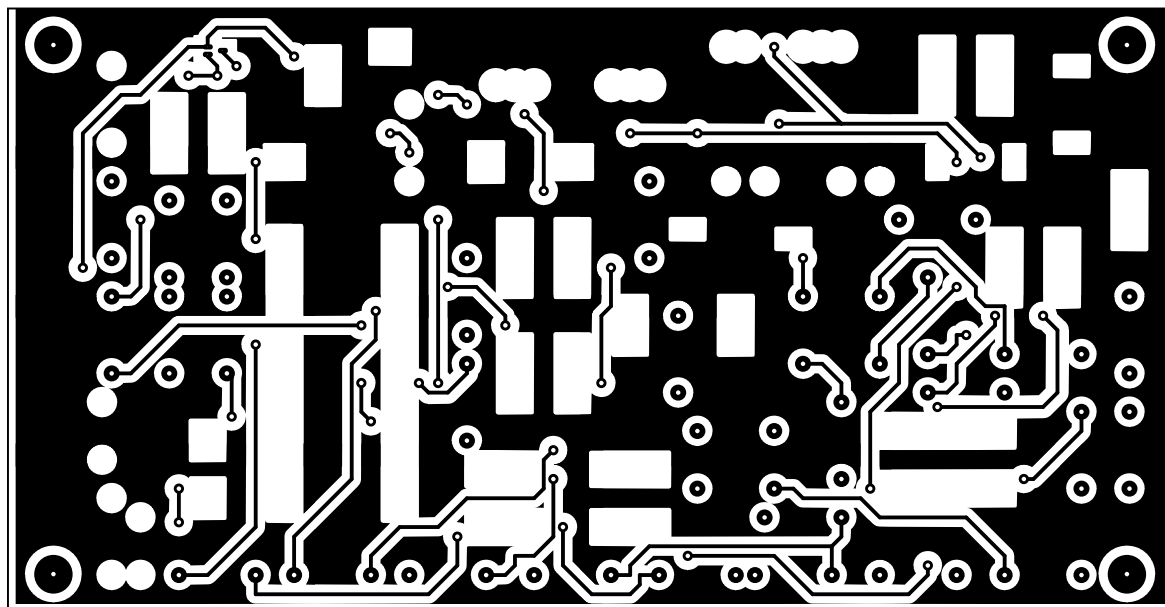

Supplement: c9sm01023h1.zip [file c9sm01023h1.zip]

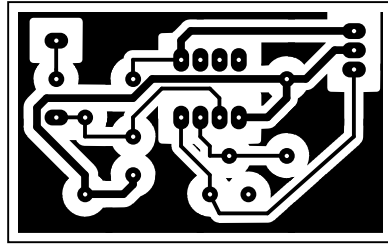

Supplement: c9sm01023h1.zip [file c9sm01023h1.zip]

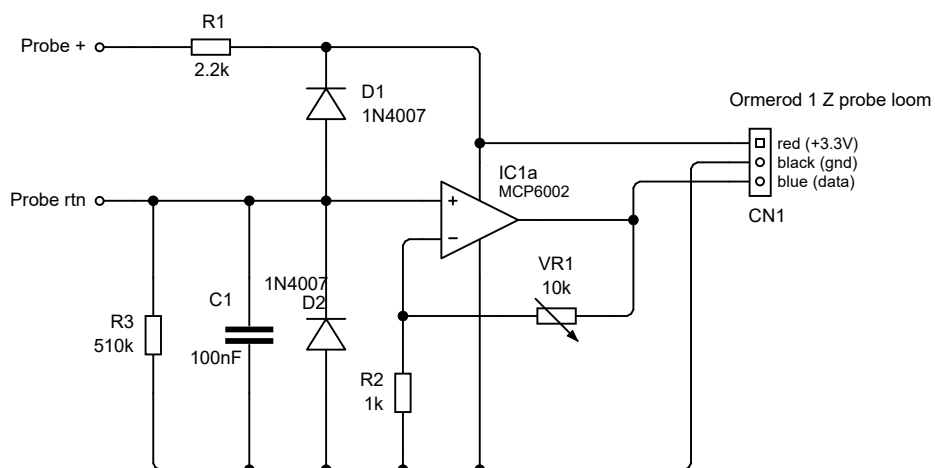

Supplement: c9sm01023h1.zip [file c9sm01023h1.zip]

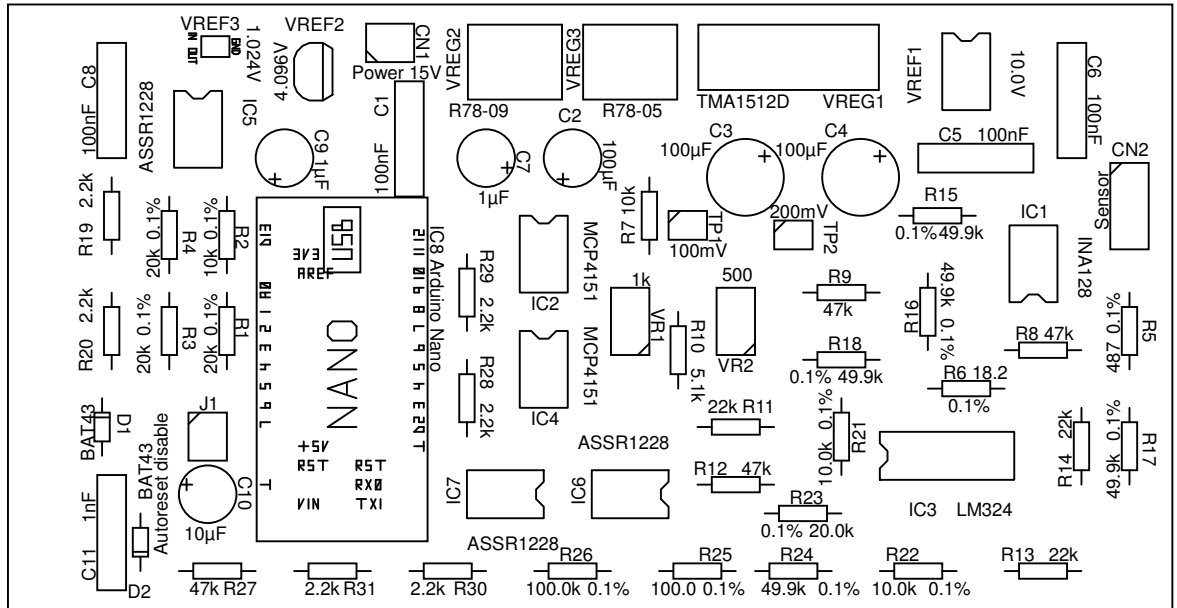

Supplement: c9sm01023h1.zip [file c9sm01023h1.zip]

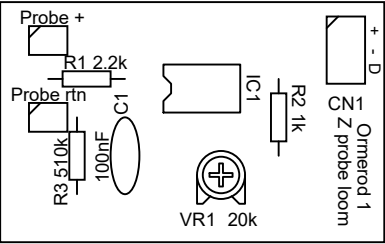

Supplement: c9sm01023h1.zip [file c9sm01023h1.zip]

Ormerod 2 Z probe loom

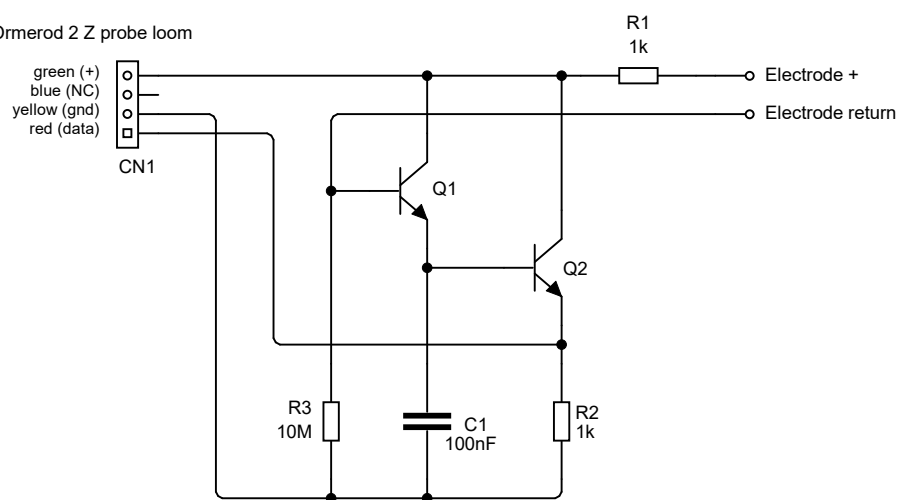

Supplement: c9sm01023h1.zip [file c9sm01023h1.zip]
